# Supplementary material for: Circularly polarized luminescence of chiral 1,8-naphthalimide-based pyrene fluorophore induced via supramolecular self-assembly
Source: Royal Society of Chemistry journal article supplement (doi:10.1039/c7tc01371j), 2017-01-01
Supplement: c7tc01371j1.pdf [file c7tc01371j1.pdf]

## SUPPORTING INFORMATION

### Contents

1. **The optimized structures obtained from density functional theory calculations.**
2. **Molecular orbital diagrams for the LUMOs and HOMOs.**
3. **CPL spectra of modified D/L ratio in CHCl<sub>3</sub>-MeOH mixtures.**
4. **<sup>1</sup>H NMR and <sup>13</sup>C NMR spectra of compounds.**
5. **SEM images of *L*-1 and *D/L*-2.**

1. The optimized structures obtained from density functional theory calculations.

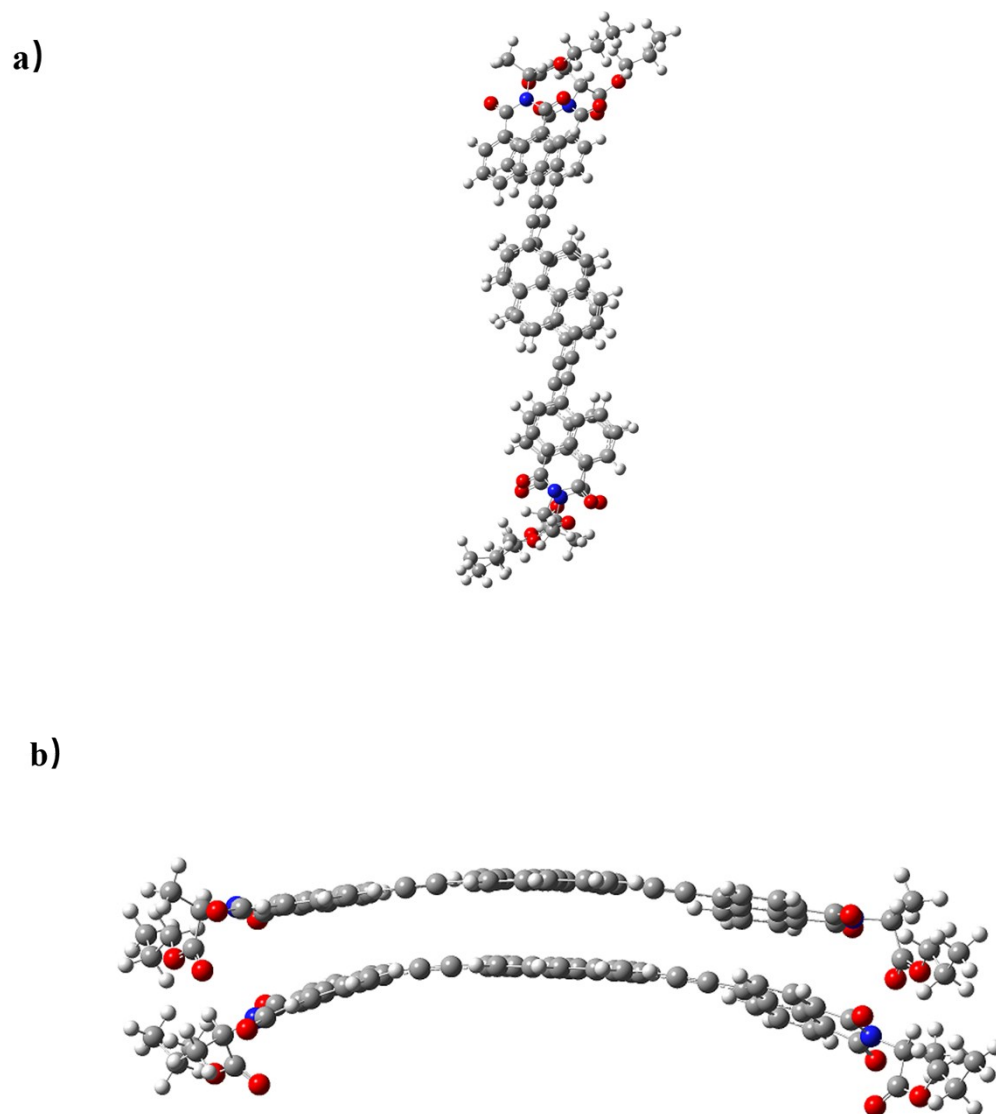

Figure S1. The optimized structures obtained from density functional theory calculations for two chiral molecules *D-1*: a) top viewport b) side viewport.

## 2. Molecular orbital diagrams for the LUMOs and HOMOs.

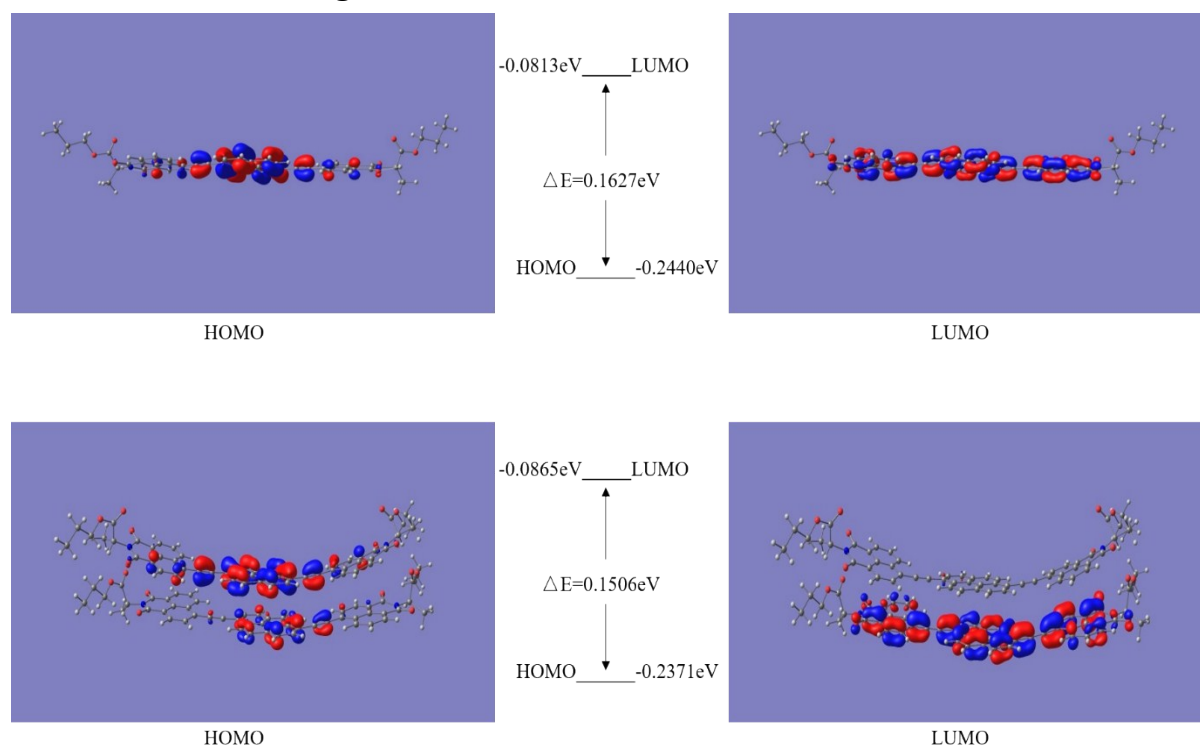

Figure S2. Molecular orbital diagrams for the LUMOs and HOMOs for both monomer and dimeric forms of **D-1** from DFT calculations.

## 3. CPL spectra of modified D/L ratio in $\text{CHCl}_3$ -MeOH mixtures.

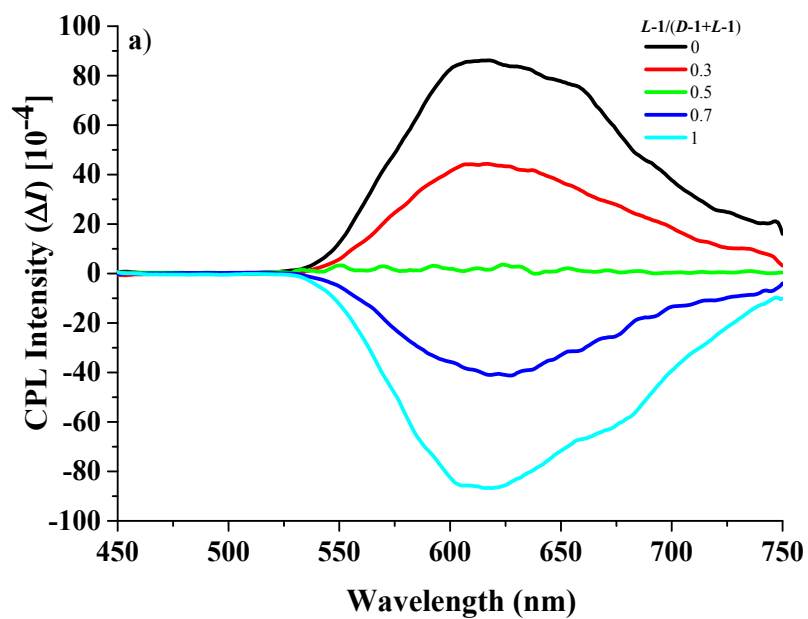

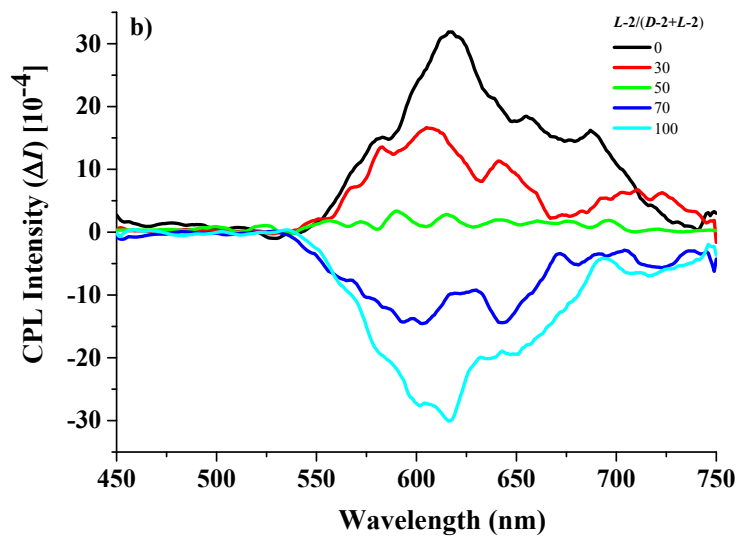

Figure S3. CPL spectra of modified *D/L* ratio of a) *D/L-1* and b) *D/L-2* in  $\text{CHCl}_3$ -MeOH mixtures at a fixed concentration ( $5.0 \times 10^{-5} \text{ mol L}^{-1}$ ,  $f_m(\text{Vol}\%)=99$ ).

#### 4. $^1\text{H}$ MR and $^{13}\text{C}$ NMR spectra of compounds.

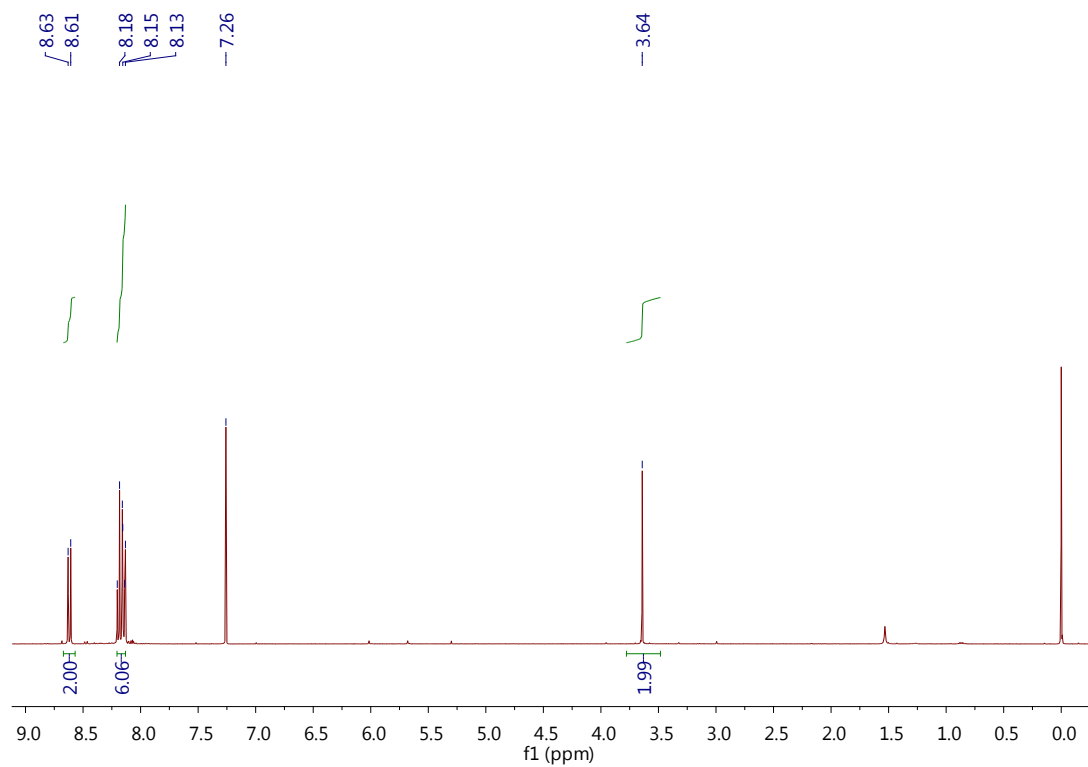

Figure S4.  $^1\text{H}$  NMR of **1** (400 MHz,  $\text{CDCl}_3$ ).

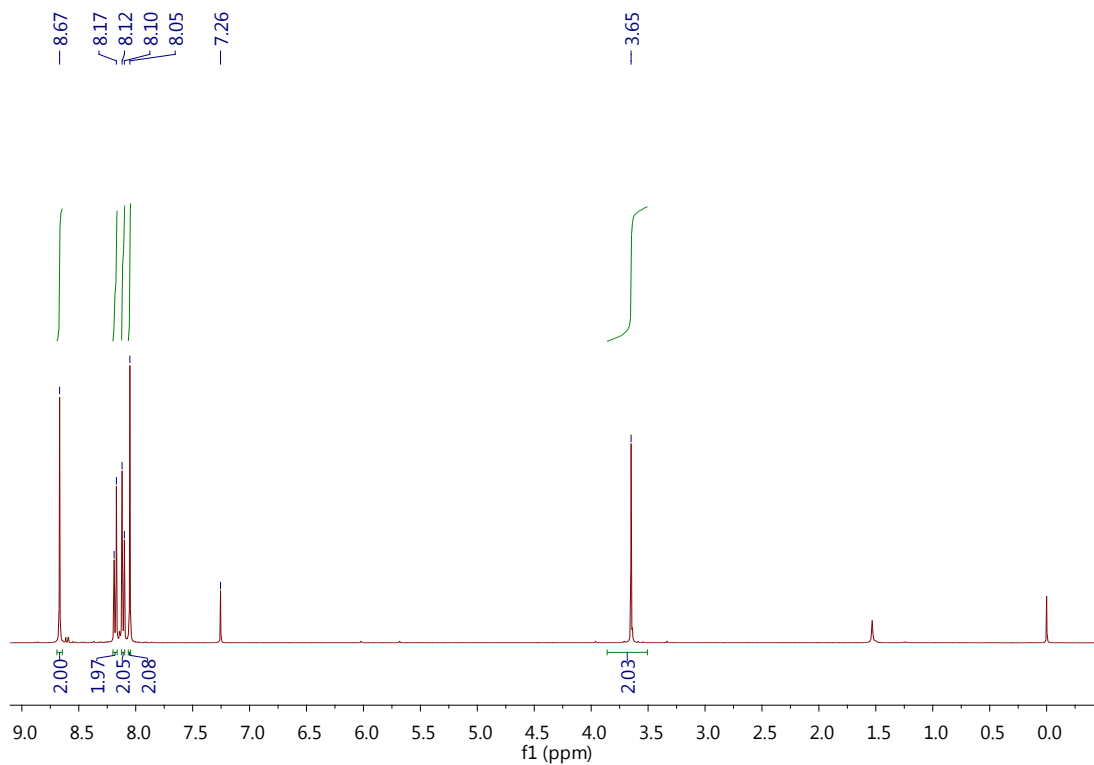

Figure S5.  $^1\text{H}$  NMR of **2** (400 MHz,  $\text{CDCl}_3$ ).

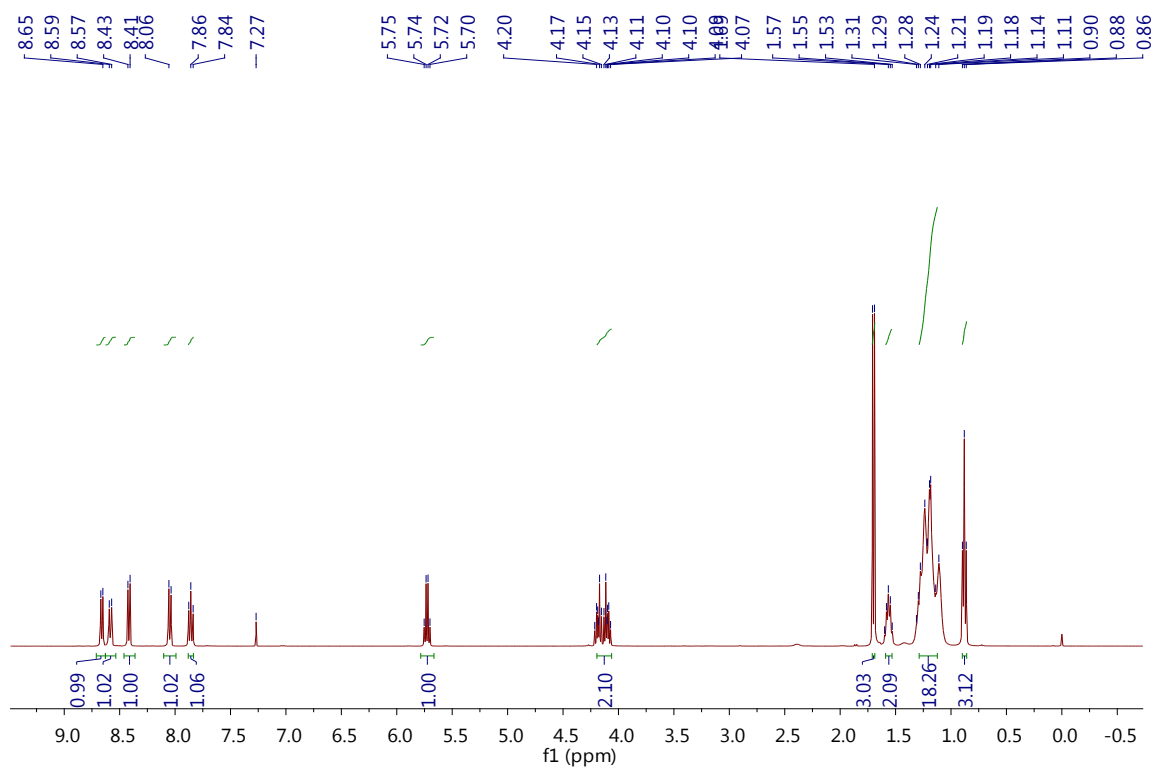

Figure S6.  $^1\text{H}$  NMR of **3** (400 MHz,  $\text{CDCl}_3$ ).

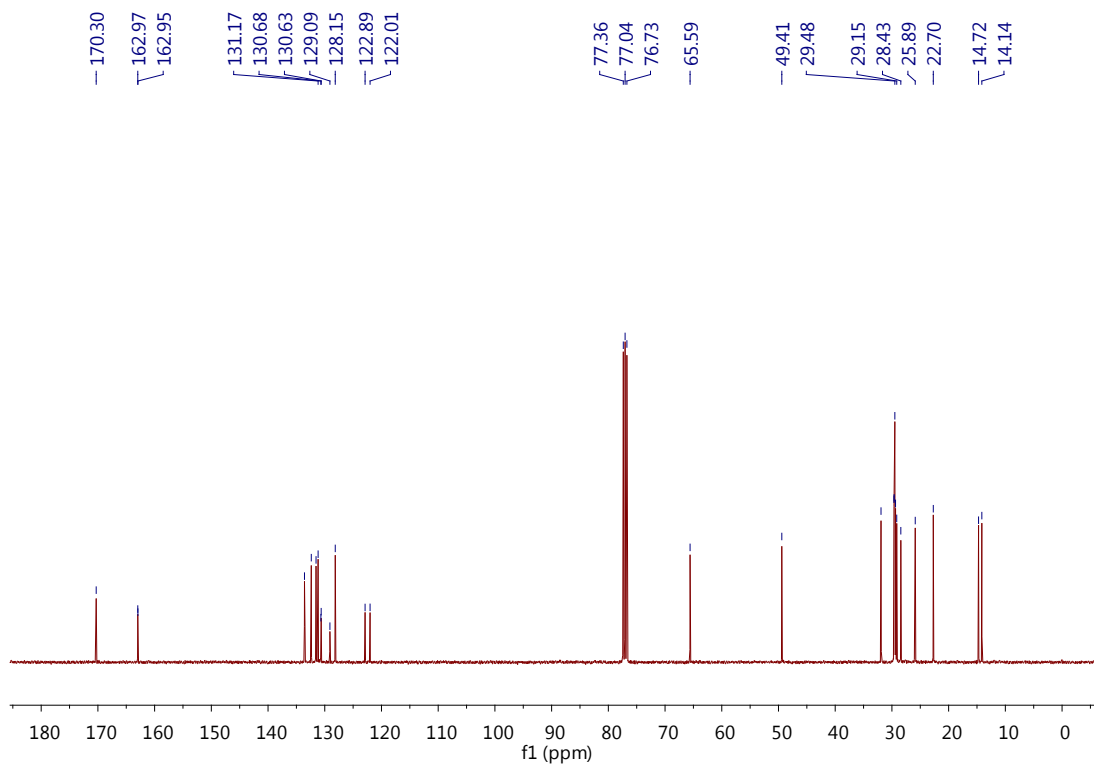

Figure S7. <sup>13</sup>C NMR of **3** (100 MHz, CDCl<sub>3</sub>).

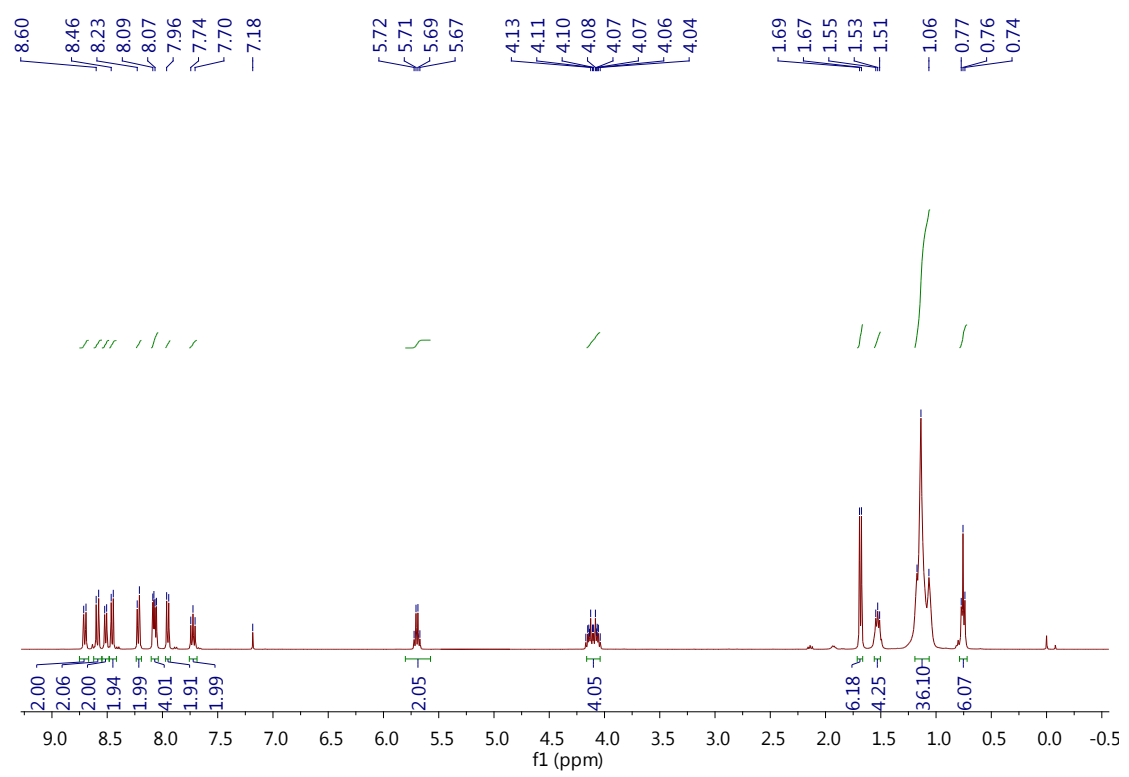

Figure S8. <sup>1</sup>H NMR of *D/L*-**1** (400 MHz, CDCl<sub>3</sub>).

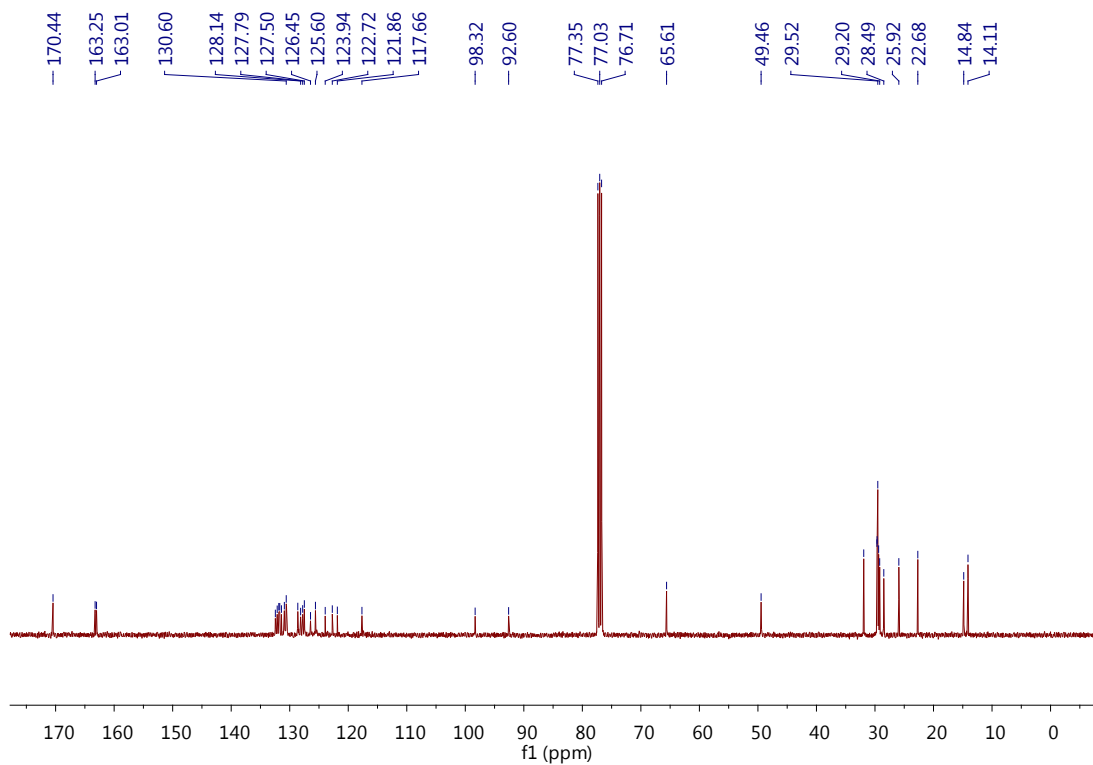

Figure S9.  $^{13}\text{C}$  NMR of *D/L-1* (100 MHz,  $\text{CDCl}_3$ ).

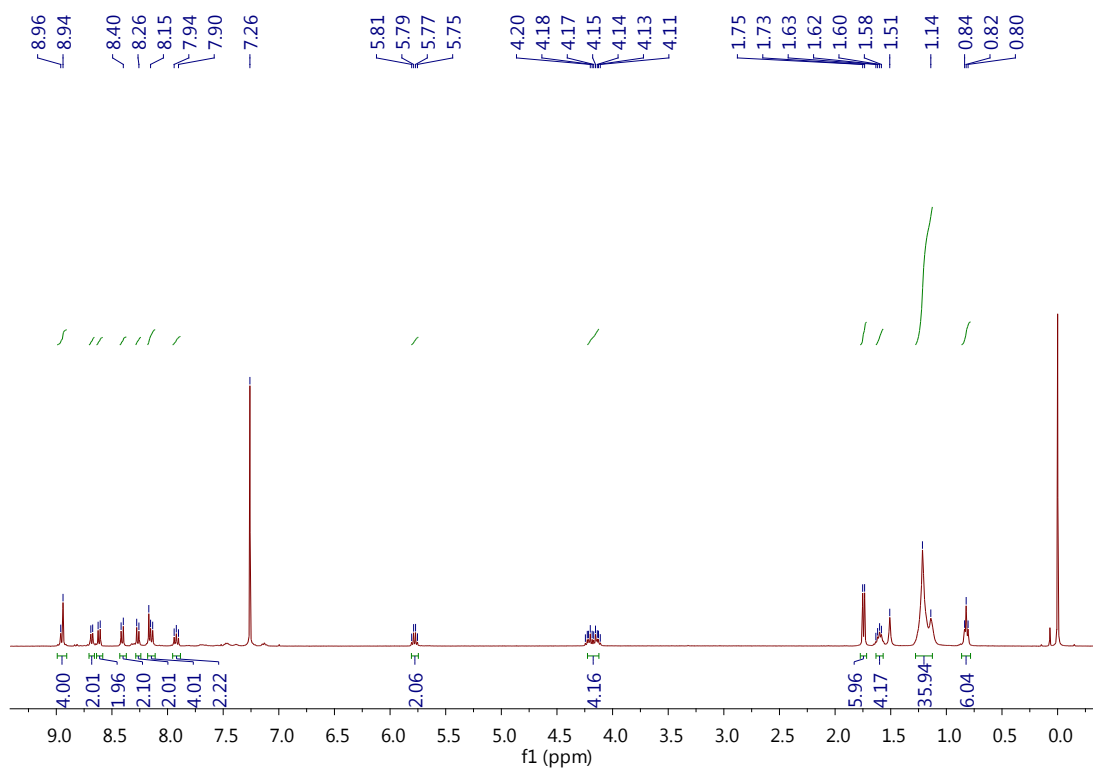

Figure S10.  $^1\text{H}$  NMR of *D/L-2* (400 MHz,  $\text{CDCl}_3$ ).

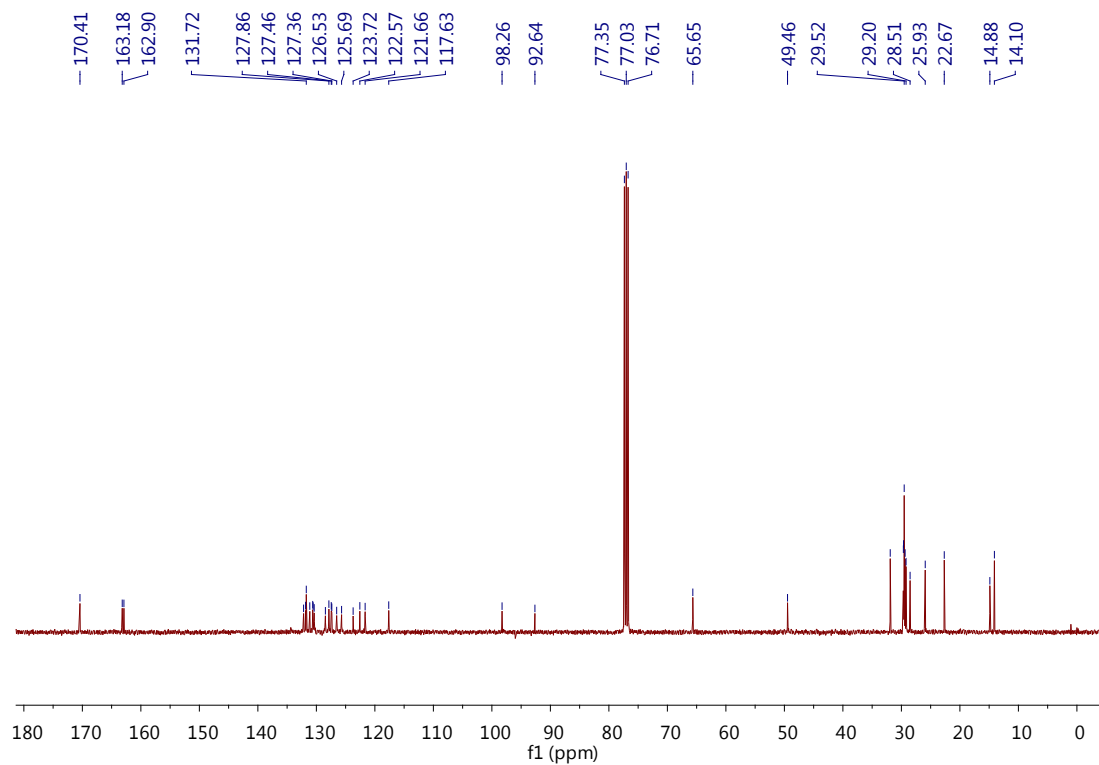

Figure S11.  $^{13}\text{C}$  NMR of *D/L-2* (100 MHz,  $\text{CDCl}_3$ ).

## 6. SEM images of *L-1* and *D/L-2*.

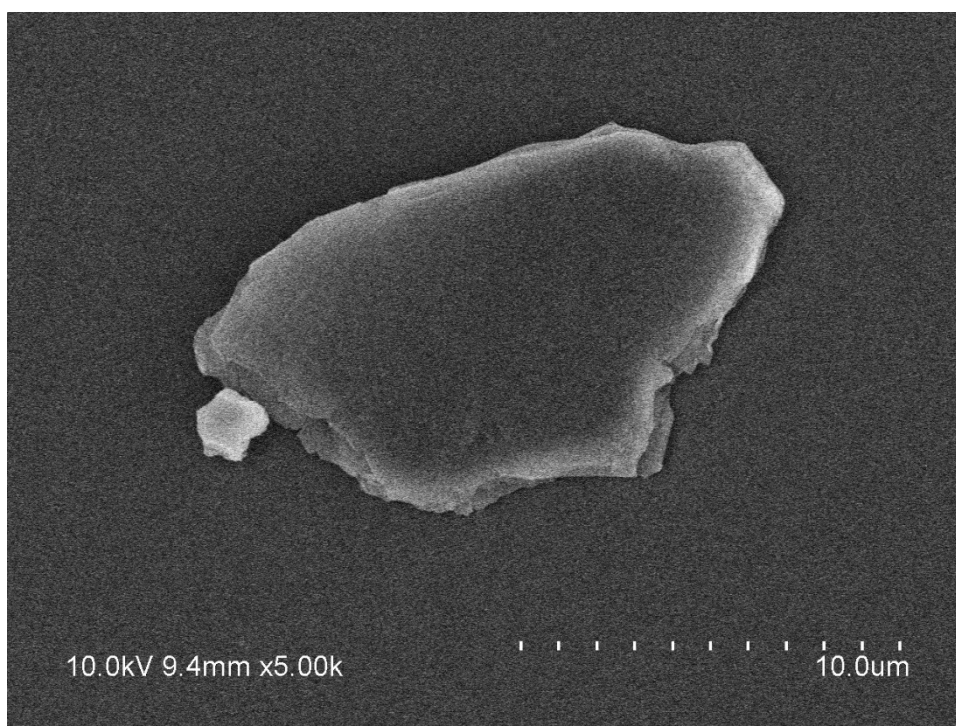

Figure S12. SEM image of *L-1* obtained from  $\text{CHCl}_3$ .



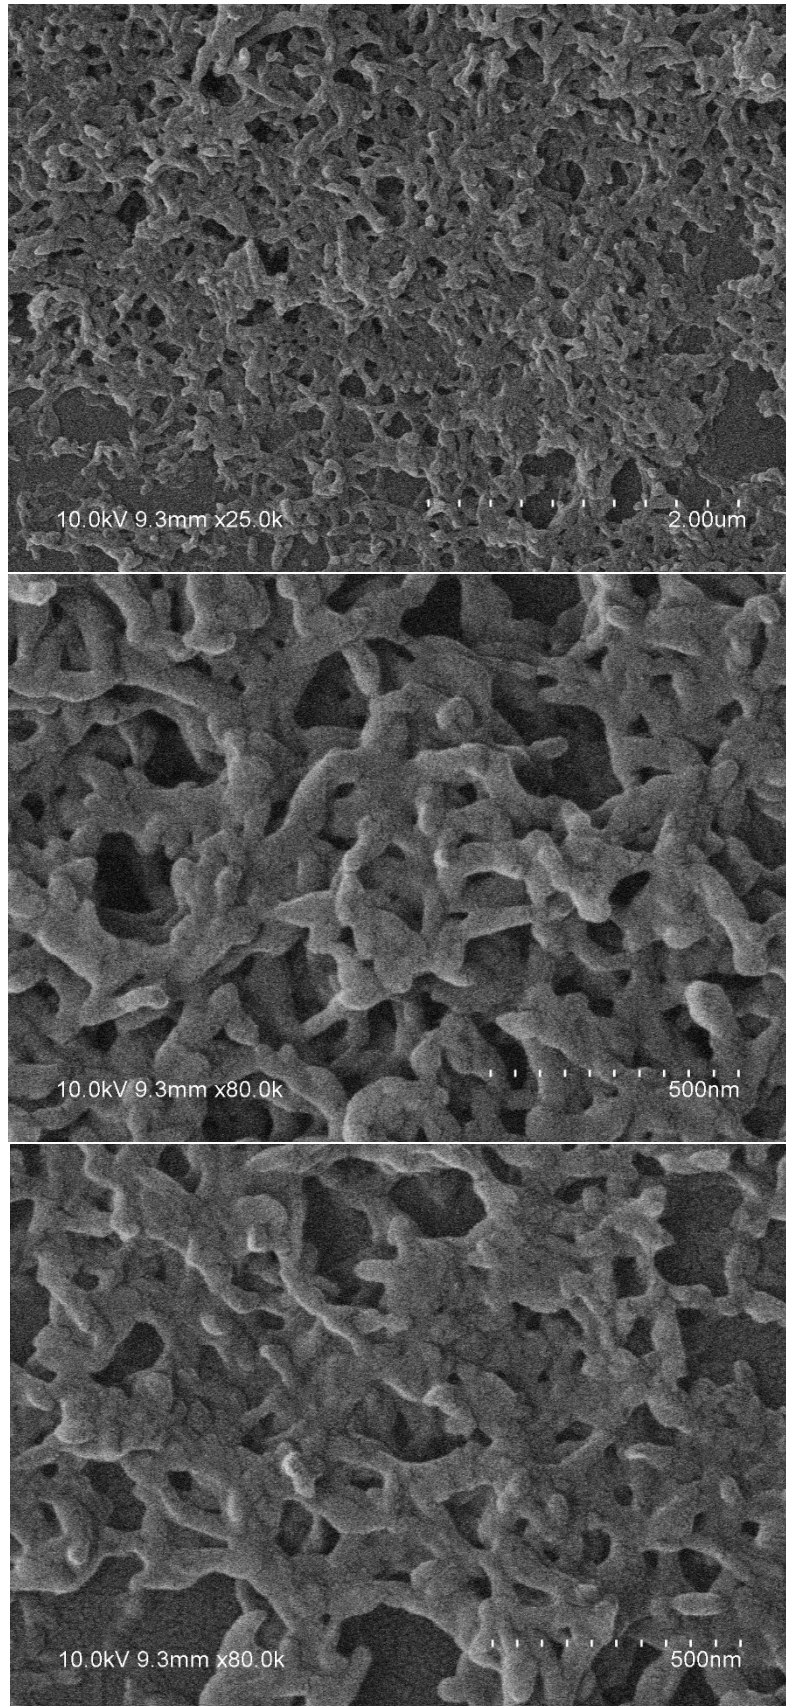

Figure S13. SEM images of *L-1* at  $f_m = 99\%$ .

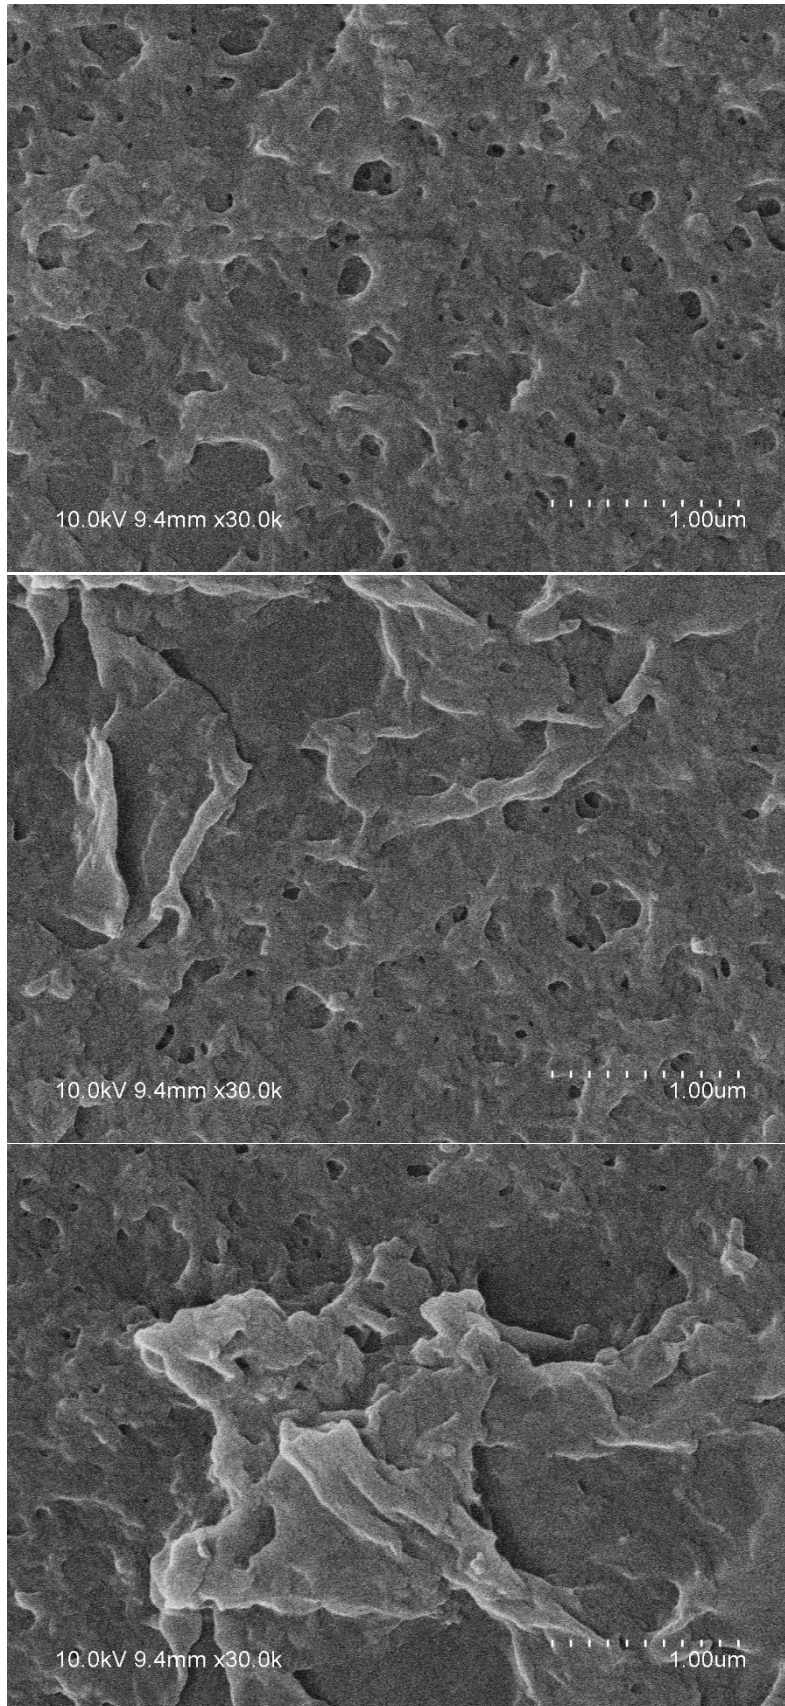

Figure S14. SEM images of *L-2* at  $f_m = 99\%$ .

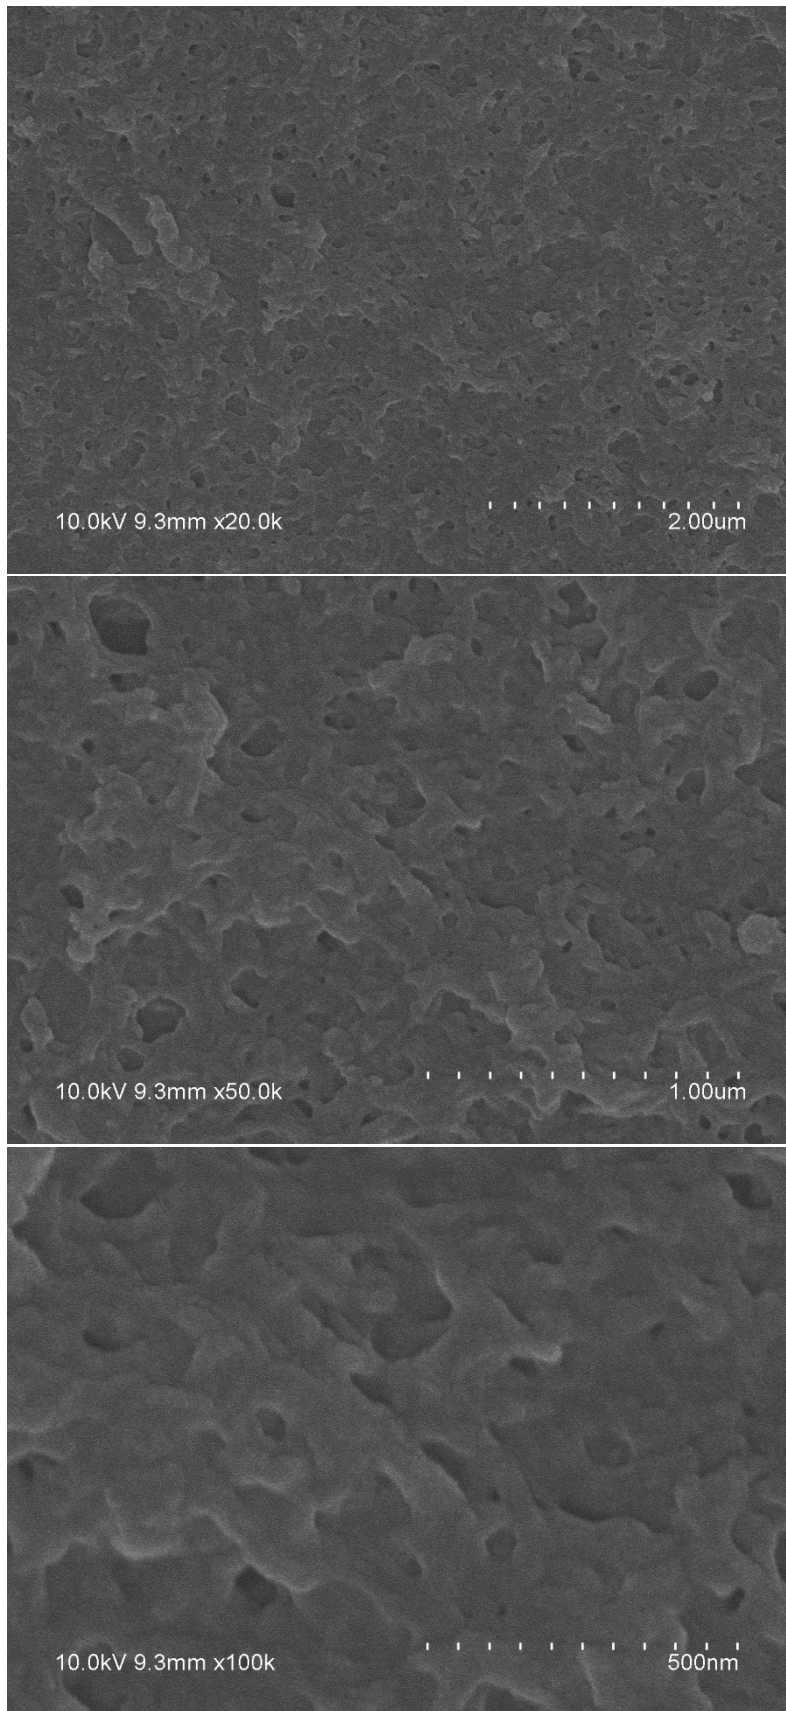

Figure S15. SEM images of *D-2* at  $f_m = 99\%$ .
